# Supplementary material
Source: Springer Nature journal article supplement (https://www.springermedizin.de/resource/supplementary/12887_2013_951_MOESM1_ESM.pdf/9476976)
Supplement: MOESM1 [file 9476976]

# ROC Curve

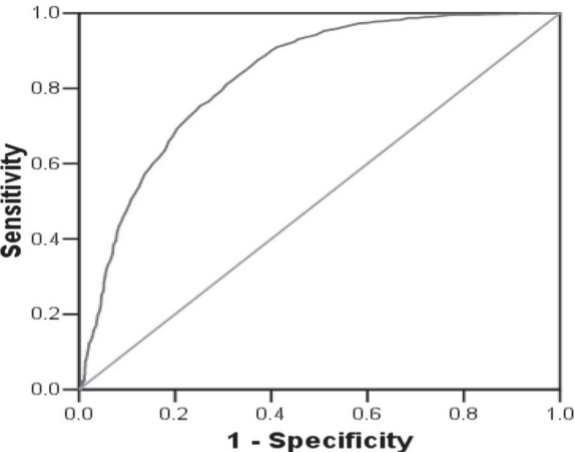

Diagonal segments are produced by ties.

| Area  | Std. Error(a) | Asymptotic Sig.(b) | Asymptotic 95% Confidence Interval |             |
|-------|---------------|--------------------|------------------------------------|-------------|
|       |               |                    | Lower Bound                        | Upper Bound |
| 0.830 | 0.009         | 0.001              | 0.813                              | 0.847       |
